# Supplementary material for: Mutational and putative neoantigen load predict clinical benefit of adoptive T cell therapy in melanoma
Source: PubMed Central journal article supplement (PMC5701046; doi:10.1038/s41467-017-01460-0), 2017-11-23
Supplement: 41467_2017_1460_MOESM1_ESM.pdf [file 41467_2017_1460_MOESM1_ESM.pdf]

## Supplementary Information

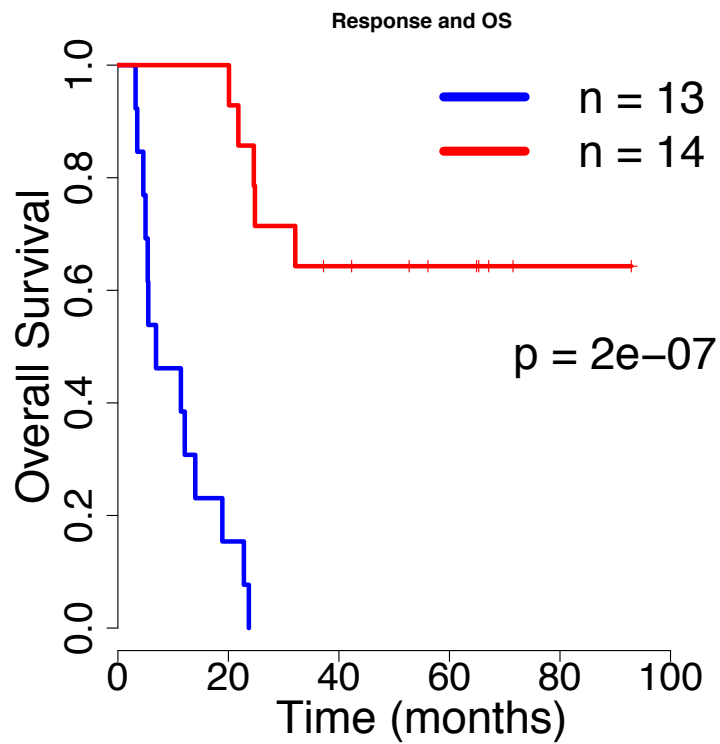

**Supplementary Figure 1.** Overall survival for the group of clinical benefit (1, red) and no-benefit (0, blue) as defined in the Material & Methods section. P-value from Cox regression.

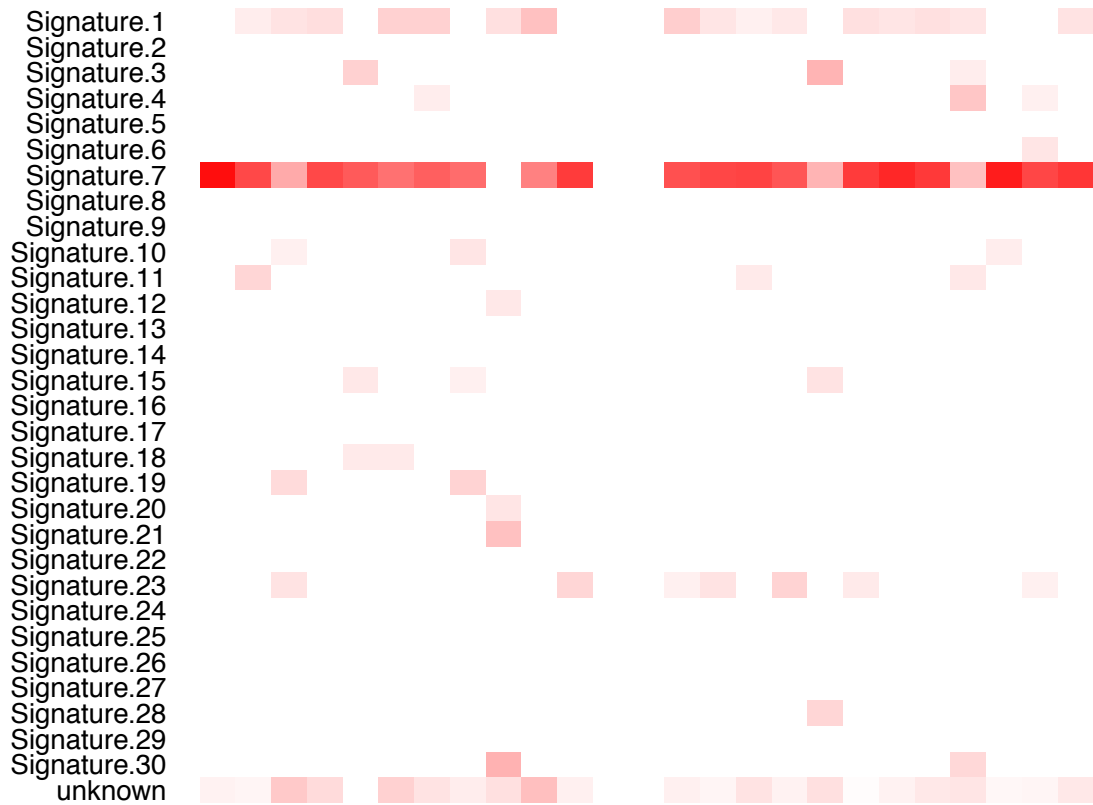

**Supplementary Figure 2.** Mutation signatures <sup>1</sup> of the pre-ACT tumor samples. Signature 7 mutations have UV-induced DNA damage etiology. On the left is the group of no clinical benefit from ACT, on the right – with clinical benefit.

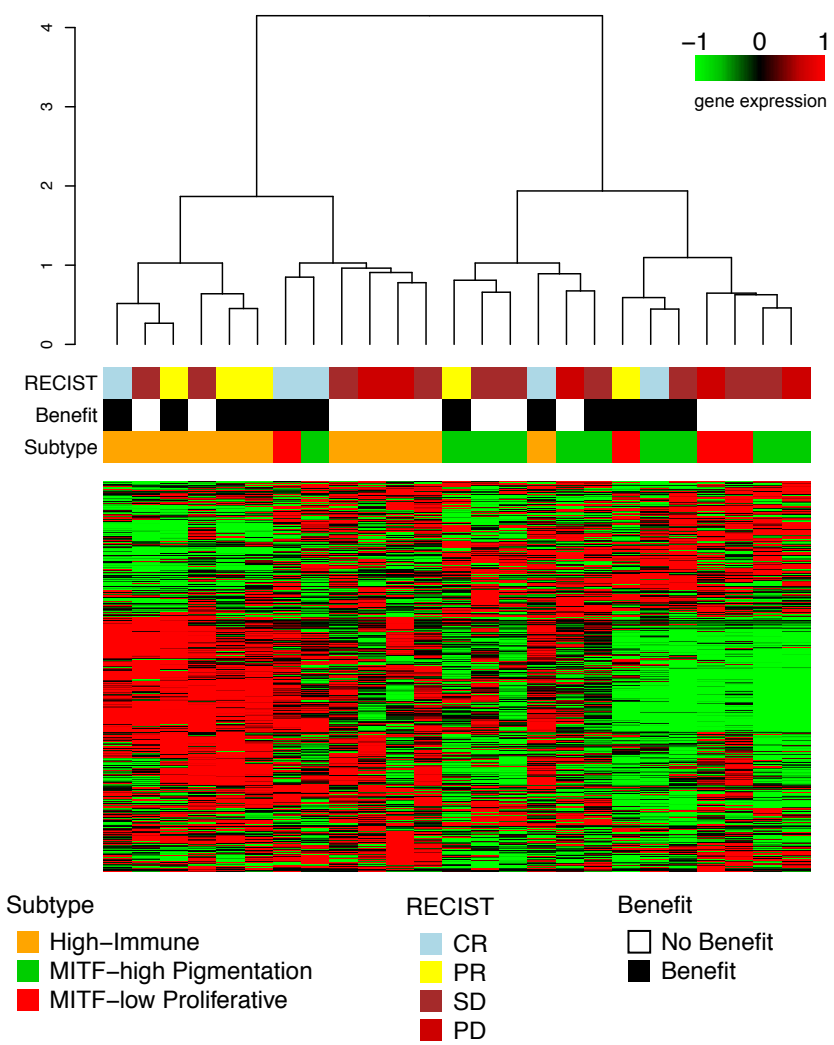

**Supplementary Figure 3.** Unsupervised clustering of ACT data. Sample distance by Pearson correlation, agglomeration by Ward's algorithm. RECIST, clinical subtypes, and gene expression phenotypes from Jonsson et al<sup>2</sup>.

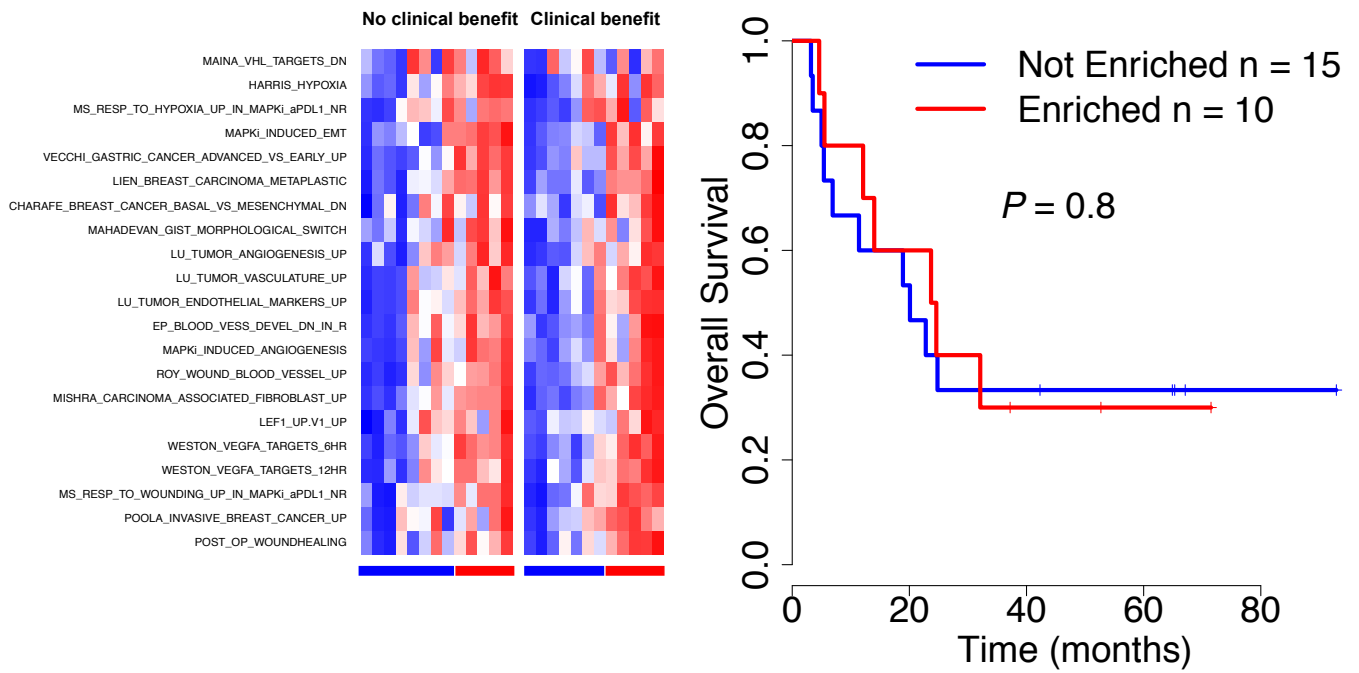

**Supplementary Figure 4.** IPRES signatures as described by Hugo et al.<sup>3</sup> applied to the ACT cohort. Left panel: Heatmap of z-scores of IPRES signatures. Samples within the response groups are ordered by mean z-scores of GSVA values and samples marked in red have crossed the mean threshold of 0.35 and accordingly were called “IPRES-enriched”. Right panel: Kaplan-Meier plot for overall survival of patients with IPRES-enriched and IPRES-not-enriched samples. P-value from Cox regression.

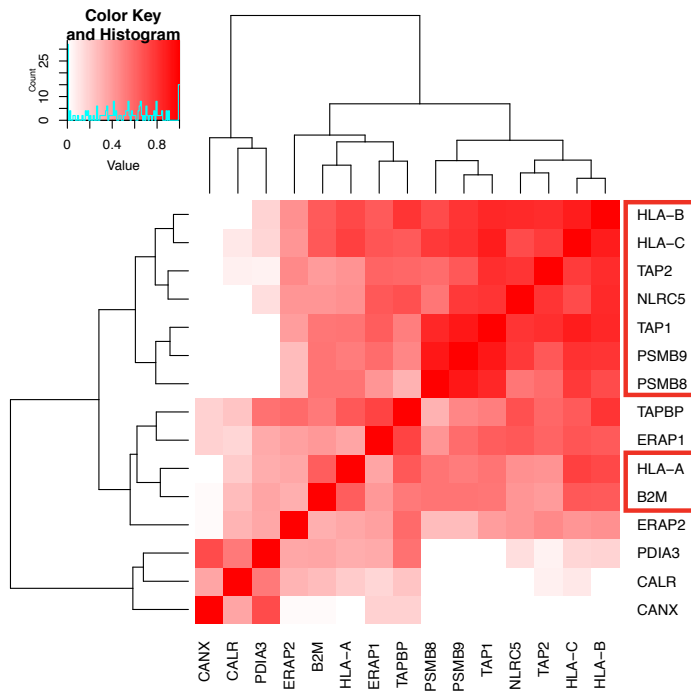

**Supplementary Figure 5.** Correlation matrix of MHC-I pathway genes in the ACT cohort. Genes in the red boxes displayed highest correlation and thus were termed as “core” MHC-I genes. These genes were used to create the MHC-I score.

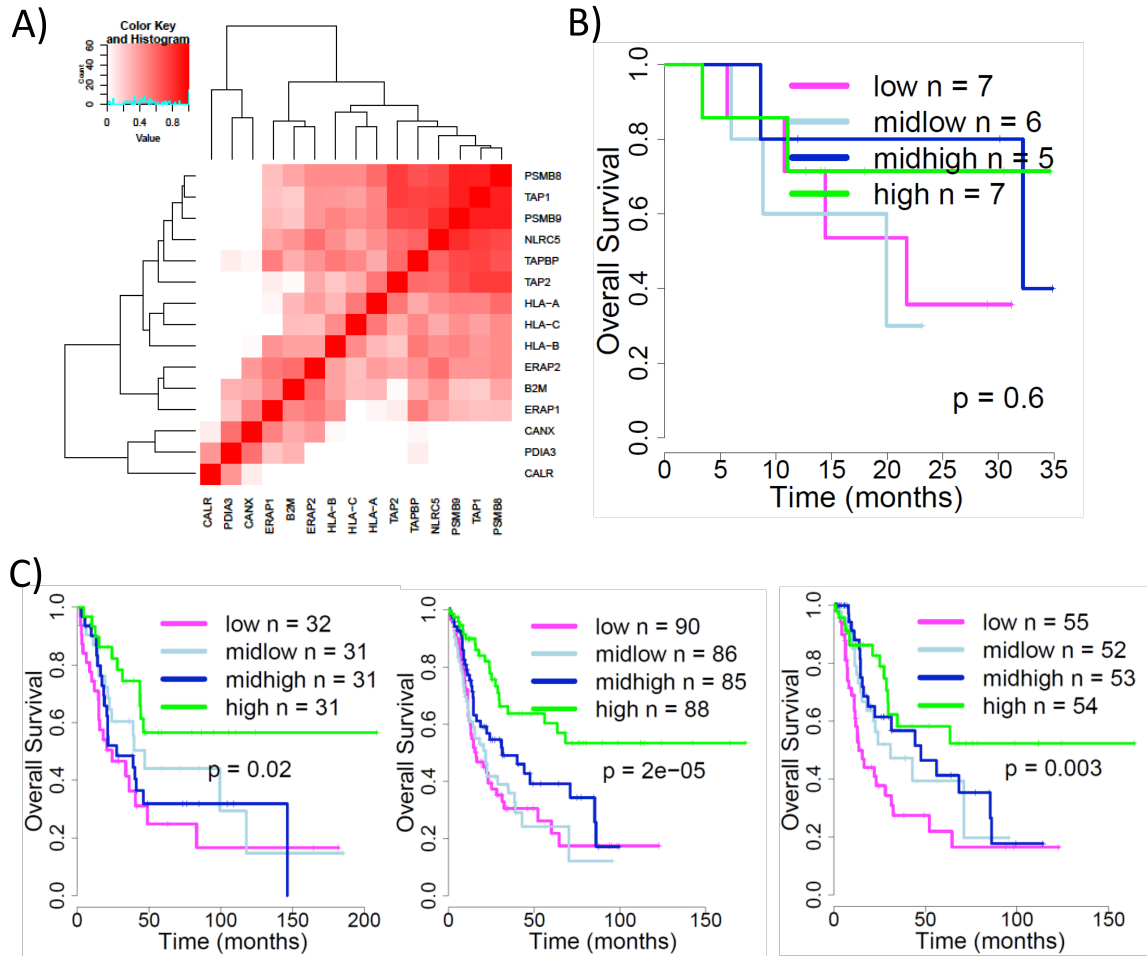

**Supplementary Figure 6.** Assessment of significance of MHC class I antigen processing and presentation pathway expression in independent data sets **A)** Co-expression of MHC class I pathway genes in Hugo et al.<sup>3</sup> **B)** Expression of MHC class I pathway genes is not associated with survival following PD-1 inhibition in immunotherapy naïve melanoma patients in the Hugo et al. data.<sup>3</sup> **C)** MHC-I score had prognostic value in the Lund cohort (left) and TCGA cohort<sup>4,5</sup> of all metastases (middle) or regional lymph node metastases (right), respectively. Patients were grouped into quartiles of MHC-I mean expression score for each dataset. Fluctuations in patient numbers per group were caused by missing survival data. All P-values from Cox regression.

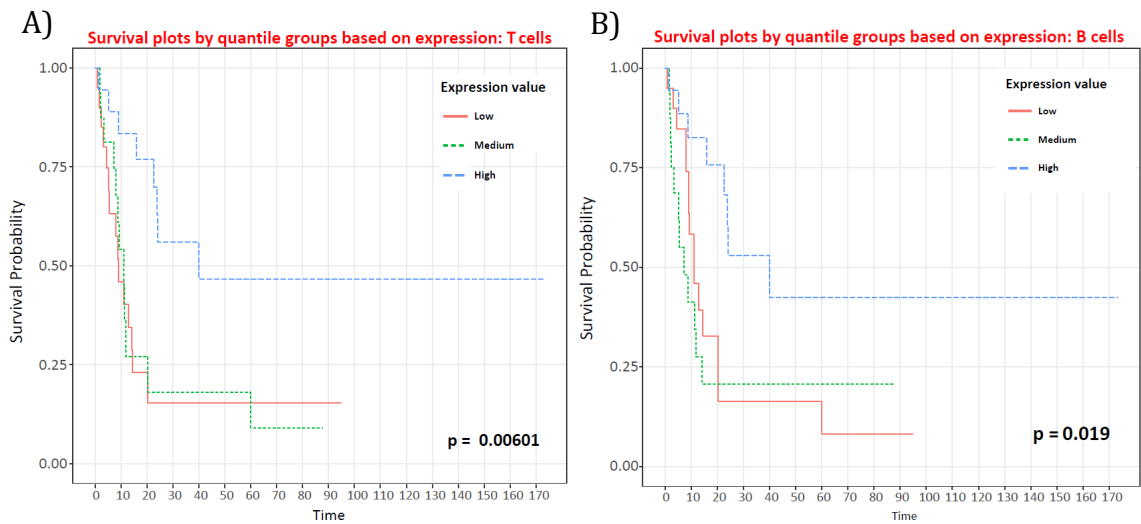

**Supplementary Figure 7.** Overall survival by T (A) and B (B) cell signatures as described in Tirosh et al.<sup>6</sup> in TCGA stage IV melanoma. All P-values from Cox regression.

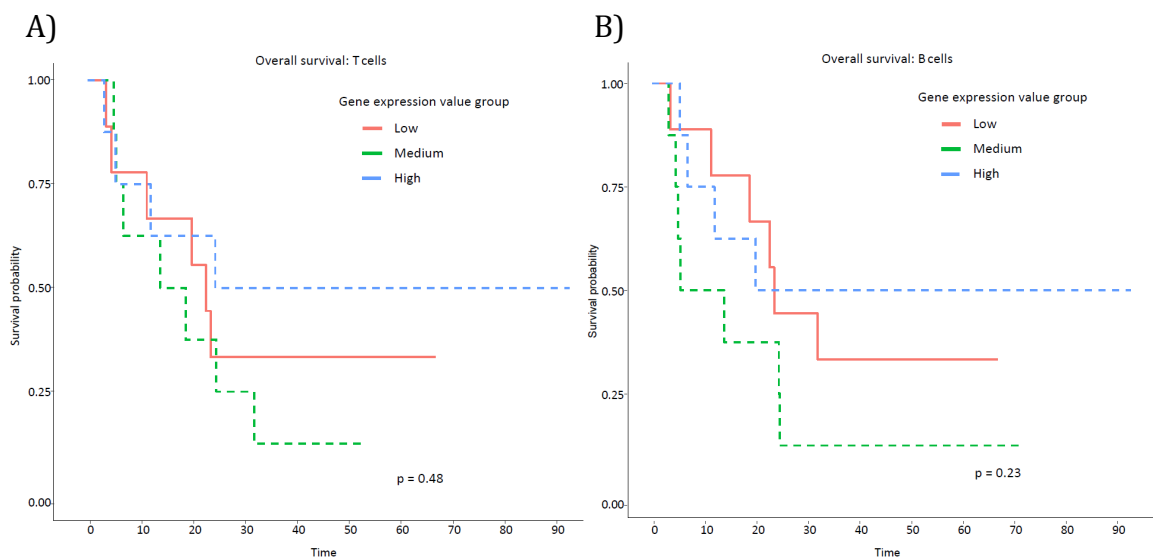

**Supplementary Figure 8.** Overall survival by T (A) and B (B) cell signatures as described in Tirosh et al.<sup>6</sup> in ACT data. All P-values from Cox regression

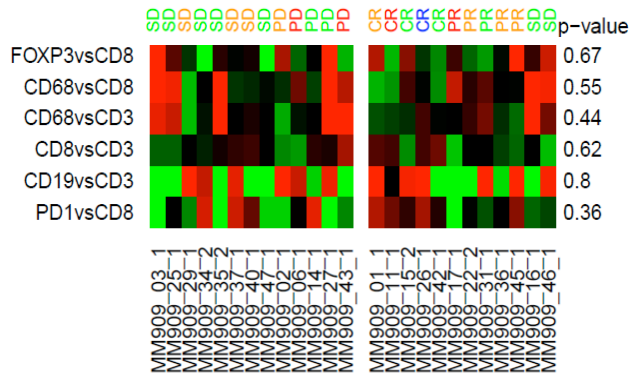

**Supplementary Figure 9.** Ratios of expression of immune cell markers in tumors from patients with no clinical benefit (left) and patients with clinical benefit (right) derived from RNAseq data. The P-values from t-test for test of differential expression between the groups are shown on the right.

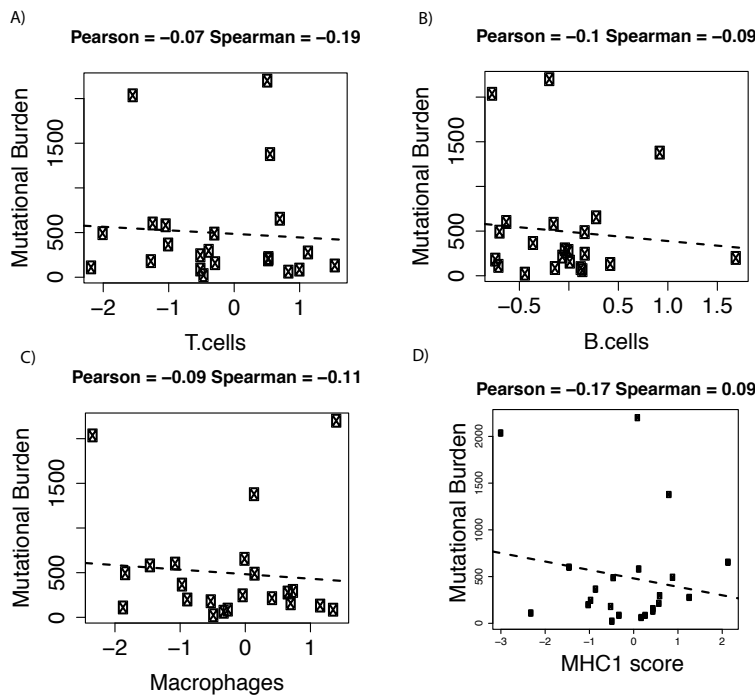

**Supplementary Figure 10.** Correlation of mutational burden to expression of immune cell signatures (A-C) and MHC1 score (D) in the ACT cohort. Pearson and Spearman correlation coefficient and linear regression line are indicated.



**Supplementary Table 1.** Gene ontology analysis and Gene Set Enrichment (GSEA) comparing tumors from patients with and without clinical benefit from ACT.

| GO Term                                                                      | FDR         | GSEA Signature                                     | NES        | FDR      |
|------------------------------------------------------------------------------|-------------|----------------------------------------------------|------------|----------|
| GO-term Clinical Benefit                                                     |             | GSEA Clinical Benefit                              |            |          |
| IPR003597:Immunoglobulin C1-set                                              | 2,27E-09    | REACTOME_IMMUNE_SYSTEM                             | -6,2049475 | 0        |
| IPR003006:Immunoglobulin/major histocompatibility complex, conserved site    | 2,02E-08    | REACTOME_ADAPTIVE_IMMUNE_SYSTEM                    | -5,1658683 | 0        |
| hsa04612:Antigen processing and presentation                                 | 7,89E-08    | REACTOME_CYTOKINE_SIGNALING_IN_IMMUNE_SYSTEM       | -4,3279705 | 0        |
| IPR011162:MHC classes I/II-like antigen recognition protein                  | 2,94E-07    | REACTOME_INTERACTIONS_OF_LYMPH_AND_NON_LYMPH_CELL  | -3,6414719 | 0        |
| GO:0002504~antigen proc. and pres. of pept. or polysacch. antigen via MHC II | 4,26E-07    | REACTOME_INTERFERON_GAMMA_SIGNALING                | -3,5601988 | 0        |
| IPR014745:MHC class II, alpha/beta chain, N-terminal                         | 5,14E-07    | REACTOME_INTERFERON_SIGNALING                      | -3,3457727 | 2,44E-05 |
| hsa05320:Autoimmune thyroid disease                                          | 6,52E-07    | REACTOME_TCR_SIGNALING                             | -3,2391462 | 2,12E-05 |
| GO:0042613~MHC class II protein complex                                      | 8,46E-07    | REACTOME_COSTIMULATION_BY_THE_CD28_FAMILY          | -3,2355878 | 2,11E-05 |
| 6p21.3                                                                       | 6,29E-06    |                                                    |            |          |
| hsa05330:Allograft rejection                                                 | 1,16E-05    | GSEA No Clinical Benefit                           |            |          |
| GO:0032395~MHC class II receptor activity                                    | 1,33E-05    | REACTOME_CELL_CYCLE                                | 4,9598265  | 0        |
| hsa05332:Graft-versus-host disease                                           | 2,28E-05    | REACTOME_CHROMOSOME_MAINTENANCE                    | 4,085007   | 0        |
|                                                                              |             | REACTOME_CENPA_CONTAINING_NUCLESOMES_AT_CENTROMERE | 3,9194016  | 0        |
| hsa05310:Asthma                                                              | 3,86E-05    | REACTOME_CELL_CYCLE_MITOTIC                        | 3,897048   | 0        |
| hsa04940:Type I diabetes mellitus                                            | 4,27E-05    | REACTOME_RNA_POL_I_PROMOTER_OPENING                | 3,7152874  | 0        |
| GO:0012507~ER to Golgi transport vesicle membrane                            | 1,02E-04    | REACTOME_DNA_REPLICATION                           | 3,5948083  | 0        |
|                                                                              |             | REACTOME_MEIOTIC_RECOMBINATION                     | 3,5742686  | 0        |
| GO-term No Clincial Benefit                                                  |             |                                                    |            |          |
| GO:0046982~protein heterodimerization activity                               | 2,855666301 | REACTOME_MITOTIC_M_M_G1_PHASES                     | 3,5113454  | 0        |

## Supplementary references

1. Alexandrov, L.B. *et al.* Signatures of mutational processes in human cancer. *Nature***500**, 415-21 (2013).
2. Jonsson, G. *et al.* Gene expression profiling-based identification of molecular subtypes in stage IV melanomas with different clinical outcome. *Clin Cancer Res***16**, 3356-67 (2010).
3. Hugo, W. *et al.* Genomic and Transcriptomic Features of Response to Anti-PD-1 Therapy in Metastatic Melanoma. *Cell***165**, 35-44 (2016).
4. Cirenajwis, H. *et al.* Molecular stratification of metastatic melanoma using gene expression profiling: Prediction of survival outcome and benefit from molecular targeted therapy. *Oncotarget***6**, 12297-309 (2015).
5. TCGA. Genomic Classification of Cutaneous Melanoma. *Cell***161**, 1681-96 (2015).
6. Tirosh, I. *et al.* Dissecting the multicellular ecosystem of metastatic melanoma by single-cell RNA-seq. *Science***352**, 189-96 (2016).
