# Supplementary material for: Mutational and putative neoantigen load predict clinical benefit of adoptive T cell therapy in melanoma
Source: PubMed Central journal article supplement (PMC5701046; doi:10.1038/s41467-017-01460-0), 2017-11-23
Supplement: 41467_2017_1460_MOESM3_ESM.pdf [file 41467_2017_1460_MOESM3_ESM.pdf]

### **Description of Supplementary Files**

File Name: Supplementary Data 1

Description: Clinical annotation data

File Name: Supplementary Data 2

Description: DNA copy number data

File Name: Supplementary Data 3

Description: Somatic mutations
